# Supplementary material for: Micro-remediation of chromium contaminated soils
Source: PeerJ. 2018 Dec 5;6:e6076. doi: 10.7717/peerj.6076 (PMC6286659; doi:10.7717/peerj.6076)
Supplement: Supplemental Information 1 [file peerj-06-6076-s001.xlsx]

## Sheet: growth
		Mean of all replicates
										S.L. E.B.		R.L. E.B.
						S. L. K2Cr2O7	S. L. K2CrO4	R. L. K2Cr2O7	R. L. K2CrO4
				C	0	4.25385	4.7157	-2.03	-2.097	0.415748	1.63846	0.65164	0.708403
					50	4.71333	4.55455	-1.8	-1.88	0.303765	0.778853	0.457321	0.25684
					100	3.64	4.07273	-1.47	-1.83	0.410783	0.876573	0.713373	0.307563
					200	4.08667	3.86364	-1.36	-1.62	0.788903	0.855386	0.96005	0.345311
					400	2.6	3.61818	-1.1	-1.29	0.323817	0.323817	0.550832	0.199669
					500	1.8	2.88182	-0.89	-0.98	0.617888	0.784836	0.713373	0.140366
					.
				EII	0	6.9	8.1	-2.9	-6.36	0.670068	0.883485	0.708403	0.685734
					50	5.1	6.45455	-2.1	-6.05	0.730889	0.726932	0.25684	1.07706
					100	4.2	5.78182	-1.7	-5.7	0.464918	0.666036	0.307563	0.569181
					200	3.8	4.84545	-1.4	-5.58	0.432769	1.04641	0.46267	0.603899
					400	3.5	3.61818	-1.3	-4.9	0.638904	0.357216	0.199669	0.434523
					500	1.9	3.51818	-0.9	-3.83	0.349498	0.553636	0.140366	0.822996
					.
				EIV	0	7.31333	6.34545	-5.4	-3.4	0.800349	1.01761	1.29796	0.670068
					50	5.02667	6.26364	-5.08	-3.22	0.428226	0.877732	0.793977	0.730889
					100	4.44	5.34545	-4.9	-3.01	0.379448	0.555855	0.720441	0.464918
					200	3.61333	4.88182	-4.5	-2.77	0.597205	1.03149	0.913479	0.432769
					400	2.93333	3.92727	-3.48	-2.37	0.454362	0.767296	0.373427	0.638904
					500	1.9	3.42727	-3.1	-2.11	0.21	0.685578	0.31	0.349498
					.
				3a	0	5.56	9.25455	-2.5	-4.5	0.52425	0.267773	0.632069	0.693738
					50	5.69333	5.53636	-4.8	-4.12	0.714107	0.865844	0.9934	0.800692
					100	3.93333	4.75455	-4.5	-3.59	0.362224	0.625861	0.456223	0.689592
					200	2.39333	5.6	-2.5	-2.98	0.226036	0.74602	0.46267	0.44961
					400	2.16667	3.65455	-3.3	-2.64	0.199682	0.354545	0.424713	0.545788
					500	2.001	3.51818	-2.1	-2.2	0.21	0.421861	0.3	0.613498

## Sheet: nol and fw
		Mean of all replicates
						Number of leaves		Fresh Weight		N.of L.		F.W. E.B.
						K2Cr2O7	K2CrO4	K2Cr2O7	K2CrO4
				C	0	4.93333	2.77686	-0.059	-0.0268	0.266667	0.898116	0.00170285	0.00915081			0.059	0.0268
					50	4.8	2.72727	-0.0513333	-0.02	0.326599	0.30424	0.00336178	0.00617914			0.0513333	0.02
					100	4.4	2.54545	-0.051	-0.0181818	0.289499	0.281672	0.00456349	0.00295979			0.051	0.0181818
					200	3.33333	2.36364	-0.049	-0.0163636	0.373741	0.452724	0.0104593	0.00278722			0.049	0.0163636
					400	2.93333	2.18182	-0.0446667	-0.0145455	0.266667	0.181818	0.00236375	0.00157459			0.0446667	0.0145455
					500	2.1	2	-0.03	-0.0136364	0	0	0.002	0.00278722			0.03	0.0136364
					.
				EII	0	4.98	5.09091	-0.067	-0.12	0.326599	0.414609	0.002	0.00750757			0.067	0.12
					50	4.9	4.90909	-0.061	-0.112727	0.330464	0.494599	0.01	0.0127985			0.061	0.112727
					100	4.5	3.81818	-0.055	-0.0727273	0.289499	0.422507	0.003	0.0030424			0.055	0.0727273
					200	3.9	3.45455	-0.051	-0.0709091	0.373741	0.474124	0.004	0.00342572			0.051	0.0709091
					400	3.1	3.27273	-0.041	-0.0554545	0.266667	0.406558	0.0032	0.00474124			0.041	0.0554545
					500	2.3	3.09091	-0.039	-0.0509091	0.330464	0.414609	0.001	0.00546968			0.039	0.0509091
					.
				EIV	0	5.2	3.09091	-0.078	-0.0627273	0.326599	0.414609	0.00991392	0.00661828			0.078	0.0627273
					50	4.93333	3.63636	-0.0673333	-0.0618182	0.330464	0.243935	0.00462567	0.00818182			0.0673333	0.0618182
					100	5.33333	3.45455	-0.0593333	-0.0609091	0.421637	0.281672	0.00396012	0.00435985			0.0593333	0.0609091
					200	3.6	3.27273	-0.0506667	-0.0563636	0.4	0.30424	0.00547433	0.00866264			0.0506667	0.0563636
					400	3.73333	3.09091	-0.0493333	-0.0509091	0.383799	0.314918	0.00407859	0.00680301			0.0493333	0.0509091
					500	2.7	3.09091	-0.044	-0.0436364	0.3	0.414609	0.001	0.0175433			0.044	0.0436364
					.
				3a	0	5.1	4.90909	-0.0633333	-0.0890909	0.181703	0.314918	0.00484686	0.00594743			0.0633333	0.0890909
					50	4.9	3.63636	-0.0665333	-0.0663636	0.373741	0.243935	0.00800111	0.00691148			0.0665333	0.0663636
					100	4.7	3.45455	-0.0593333	-0.0763636	0.261861	0.281672	0.00371184	0.00834187			0.0593333	0.0763636
					200	3.9	3.09091	-0.0413333	-0.0690909	0.326599	0.314918	0.0042389	0.00475864			0.0413333	0.0690909
					400	3.86667	2.90909	-0.0453333	-0.0490909	0.236375	0.314918	0.00255728	0.00731804			0.0453333	0.0490909
					500	3.1	2.72727	-0.04	-0.0454545	0	0.30424	0.004	0.00679085			0.04	0.0454545

## Sheet: chlorophyll a, b and carotenoid
			Mean of all replicates
											Chl 'a' EB		chl 'b' EB		Carotenoid EB				Chlorophyll 'b'		Carotenoid
			Chl 'a' K2Cr2O7	Chl 'a' K2CrO4	Chl 'b' K2Cr2O7	Chl 'b' K2CrO4	Carotenoid K2Cr2O7	Carotenoid K2CrO4											K2Cr2O7	K2CrO4	K2Cr2O7	K2CrO4
	C	0	4.55667	4.55667	11.54	11.54	-3.19333	-3.19333			0.0166667	0.0290593	0.2	0.152753	0.00666667	0.0344109			-11.54	-11.54	3.19333	3.19333
		50	2.005	4.29	6.9	5.39139	-2.38333	-2.96333			0.396001	0.033	0.62462	0.350846	0.392994	0.0145297			-6.9	-5.39139	2.38333	2.96333
		100	1.71	4.13	5.8	5.26606	-2.16	-2.72729			0.0635085	0.0913	0.16	0.0144729	0.594755	0.0118616			-5.8	-5.26606	2.16	2.72729
		200	1.20833	4.1312	5.5	5.16419	-1.49667	-1.48395			0.0997636	0.0313	0.319496	0.337133	0.222586	0.0144716			-5.5	-5.16419	1.49667	1.48395
		400	1.075	1.7967	4.7	4.68273	-0.8	-1.42124			0.0259808	0.2801	0.2818	0.0175338	0.34641	0.0203689			-4.7	-4.68273	0.8	1.42124
		500	0.315333	1.2	3.9	4.1	-0.65	-0.36			0.175803	0.1	0.326037	0.350846	0.0866025	0.09			-3.9	-4.1	0.65	0.36
		.																	0	0
	EII	0	8.6	9.1	12.45	12.6	-3.73333	-4.4			0.550757	0.02	0.55	0.01	0.463081	0.0145297			-12.45	-12.6	3.73333	4.4
		50	7.55	8.2	12.3667	10.9	-2.88667	-3.6			0.62	0.04	0.491031	0.0931931	0.313333	0.0118616			-12.3667	-10.9	2.88667	3.6
		100	4.75	7.5	7.02333	9.2	-2.19333	-3.1			0.410041	0.01	0.258478	0.0173381	0.233333	0.0224074			-7.02333	-9.2	2.19333	3.1
		200	3.32	7.1	5.9	8.9	-1.65	-2.7			0.311769	0.03	0.941636	0.0923786	0.294449	0.0571744			-5.9	-8.9	1.65	2.7
		400	2.58333	6.2	4.9	7.6	-1.37667	-2.2			0.676667	0.03	0.0333333	0.0410352	0.173333	0.105174			-4.9	-7.6	1.37667	2.2
		500	1.09333	5.99	4.1	7.4	-0.918333	-1.1			0.0733333	0.01	0.09	0.0156675	0.133333	0.294016			-4.1	-7.4	0.918333	1.1
		.																	0	0
	EIV	0	6.6	5.26	13.7233	14.86	-5.1	-3.17097			0.343333	0.727927	0.0766667	1.63808	0.043589	0.0145297			-13.7233	-14.86	5.1	3.17097
		50	2.17	6.22729	8.43333	12.6531	-3.86667	-2.9			0.688573	0.0118611	0.970109	0.0347818	0.259629	0.0348147			-8.43333	-12.6531	3.86667	2.9
		100	2.36667	5.95059	10.3667	11.7377	-2.77333	-2.8			0.29734	0.0231015	0.683943	0.0931931	0.730897	0.0224074			-10.3667	-11.7377	2.77333	2.8
		200	2.15667	5.28071	8.3	10.6192	-1.51333	-1.9			0.130427	0.0173352	0.416333	0.0173381	0.277629	0.0571744			-8.3	-10.6192	1.51333	1.9
		400	2.06	4.80542	5.9	9.56931	-0.99	-1.7			0.518588	0.0924014	0.11547	0.0923786	0.429625	0.0331426			-5.9	-9.56931	0.99	1.7
		500	1.06667	4.1	4.3	6.6	-0.8	-0.9			0.0333333	0.09	0.208167	0.02	0.09	0.0034727			-4.3	-6.6	0.8	0.9
		.																	0	0
	3a	0	5.6	5.44391	16.8967	14.8537	-4.415	-3.47548			0.0333333	0.0238835	0.574466	0.112684	0.0857321	0.105174			-16.8967	-14.8537	4.415	3.47548
		50	2.3	5.34399	11.7	13.9988	-3.08667	-3.10081			0.46188	0.17711	0.404145	0.104199	0.563215	0.294016			-11.7	-13.9988	3.08667	3.10081
		100	2.1	5.20924	10.3333	12.4729	-2.56	-2.9			0.288675	0.0584697	0.338296	0.0410352	0.27	0.0034727			-10.3333	-12.4729	2.56	2.9
		200	1.7	4.87433	9.8	11.8187	-1.71333	-2.1			0.0881917	0.0325616	0.208167	0.0156675	0.316877	0.00644483			-9.8	-11.8187	1.71333	2.1
		400	1.2	4.57776	9.49	11.429	-0.833333	-1.9			0.176383	0.0174643	0.414045	0.0115902	0.494851	0.0144348			-9.49	-11.429	0.833333	1.9
		500	0.466667	3.9	10.4798	13.2209	-0.7	-1.67			0.0881917	0.09	0.61101	0.01	0.541972	0.0571744			-10.4798	-13.2209	0.7	1.67

## Sheet: auxin protein
			Mean of all replicates
			Protein		protein E.B.		auxin		auxin E.B.									auxin
			K2Cr2O7	K2CrO4			K2Cr2O7	K2CrO4										K2Cr2O7	K2CrO4
	C	0	203.667	346	1.33333	2.3094	-39	-22	1.1547	4								39	22
		50	201	333.667	4.40959	8.66667	-38.3	-18	1.45	1								38.3	18
		100	166.667	243	16.9148	9	-36.7	-17	1.45297	1								36.7	17
		200	155.333	186.333	2.66667	4.33333	-29.6	-12	4.70225	2								29.6	12
		400	119.667	76.3333	5.78312	24.3333	-25.3	-6.66667	3.71184	0.333333								25.3	6.66667
		500	105.9	67.6667	4.5	29.6329	-22	-5.66667	2.1	0.333333								22	5.66667
		.
	EII	0	255.1	420.333	4.5	6.06447	-44	-27	2.1	4.17665								44	27
		50	245	410.667	3.9	2.72845	-41	-24.6667	2.9	0.333333								41	24.6667
		100	221	316.333	5.1	8.66667	-38	-21	4.1	6.08276								38	21
		200	189	299	2.1	13	-31	-19	3.9	9.66667								31	19
		400	151	278.333	4.1	10.4775	-27	-12	3.1	7								27	12
		500	141	264.333	2.1	21.6667	-23	-10	2.1	1.1								23	10
		.
	EIV	0	458.333	618.667	3.33333	31.3333	-60.6667	-53.3333	2.33333	0.881917								60.6667	53.3333
		50	321	574.667	21.6667	2.18581	-62.3	-38.6667	1.76383	3.4801								62.3	38.6667
		100	210	556	5.7735	4.04145	-60.6	-31	3.28295	8.96289								60.6	31
		200	171	510.333	16.4148	11.2891	-44	-16.6667	2.08167	3.84419								44	16.6667
		400	130	455	10	9	-33.6667	-14.6667	4.17665	2.02759								33.6667	14.6667
		500	121	329.333	11	4.33333	-25	-10	2.9	1.52753								25	10
		.
	3a	0	251	450.333	4.40959	6.06447	-65	-75.3333	3.21455	3.1798								65	75.3333
		50	211	437.667	4.40959	4.33333	-41.3333	-46	4.70225	0.57735								41.3333	46
		100	167	385.667	11.6667	37.2395	-47.6667	-31.6667	1.76383	4.97773								47.6667	31.6667
		200	152	299	14.24	1.1547	-39	-17	3.92994	1.1547								39	17
		400	139	268.667	20.2073	13.4205	-35	-14.3333	5.1316	6.35959								35	14.3333
		500	121	242.667	15	25.458	-24	-10.6667	3.1	7.5351								24	10.6667
